# Supplementary material
Source: HighWire-hosted journal article supplement (https://www.cmajopen.ca/highwire/filestream/81078/field_highwire_adjunct_files/0/open-2016-0094-original-submission.pdf)
Supplement: open-2016-0094-original-submission.pdf [file open-2016-0094-original-submission.pdf]

1  
2  
3 **Title: A Retrospective Cohort of Surgically Diagnosed Idiopathic Aortitis Cases in a Canadian**  
4 **Centre**  
5

6  
7 Authors: Diane L Murzin<sup>1</sup>, MD; Eric C Belanger<sup>2</sup>, MD, FRCPC; John P Veinot<sup>2</sup>, MD, FRCPC;  
8 Nataliya Milman<sup>1,3</sup>, MD, FRCPC, MSc, and Canadian Vasculitis Network (CanVasc)  
9

- 10  
11 1. University of Ottawa, Department of Medicine, Division of Rheumatology, Ottawa, Ontario,  
12 Canada.  
13 2. Department of Pathology and Laboratory Medicine, the Ottawa Hospital, Ottawa, Ontario,  
14 Canada.  
15 3. Department of Clinical Epidemiology, Ottawa Hospital Research Institute, Ottawa, Ontario,  
16 Canada  
17  
18

19  
20  
21 \*Corresponding author:  
22

23 Dr. Nataliya Milman  
24 Ottawa Hospital, Riverside Campus  
25 Department of Rheumatology  
26 1967 Riverside Drive, Box 37  
27 Ottawa, ON K1H 7W9  
28 Email: [nmilman@toh.on.ca](mailto:nmilman@toh.on.ca)  
29 tel: 613-738-8400 ext. 81871; fax: 613-738-8492  
30  
31

32  
33 No grants or other financial support has been received in relation to this work, and authors  
34 report no competing interests.  
35  
36  
37  
38  
39  
40  
41  
42  
43  
44  
45  
46  
47  
48  
49  
50  
51  
52  
53  
54  
55  
56  
57  
58  
59  
60

1  
2  
3 *Abstract:*  
4

5 **Objective:** Idiopathic aortitis (IA) became recognized relatively recently; the body of knowledge  
6 related to this condition is scarce. This study aims to determine: the frequency of IA in aortic  
7 specimens; its clinical, laboratory, and radiological characteristics at diagnosis and during  
8 follow-up; and the approach to work-up, treatment and monitoring taken by the treating  
9 physicians.  
10  
11  
12  
13  
14  
15  
16  
17

18  
19 **Methods:** Cases of aortitis diagnosed on pathologic specimens of aorta over a 10 year period at  
20 The Ottawa Hospital were identified. Charts were reviewed and data on patient demographics,  
21 clinical features, laboratory and imaging tests, treatment, and outcomes were analyzed.  
22  
23  
24  
25  
26

27 **Results:** Six hundred and eighty four aortic specimens were analyzed during the study period;  
28 47 cases of aortitis were identified, 32 of which were IA. Two thirds (21/32) of patients with IA  
29 had complete imaging of branch vessels and 16/21 (76%) had additional baseline aortic or  
30 branch vessel lesions. Corticosteroids were used in 12/32 (38%) of patients with IA; elevated  
31 perioperative inflammatory markers was the only significant predictor of corticosteroid use.  
32  
33  
34  
35  
36  
37  
38  
39  
40  
41  
42  
43  
44  
45  
46  
47  
48  
49  
50  
51  
52  
53  
54  
55  
56  
57  
58  
59  
60  
Over mean follow-up of 47.5 months new aortic or branch lesions were diagnosed in 5 out of 12  
(42%) imaged IA patients, three patients required additional vascular surgery and 2 were  
diagnosed with systemic conditions.

**Conclusion:** IA is commonly discovered incidentally on examination of pathologic specimen  
following ascending aortic aneurysm repair. No guidelines exist for the workup, treatment, and  
follow-up of IA resulting in great variability of practice. Good quality prospective studies are  
needed to address unanswered questions about IA.

## Introduction:

Aortitis is a general term used to describe inflammation of the aorta (1). It is known to be associated with a variety of systemic vasculitides (most commonly giant cell arteritis (GCA)(2,3) and Takayasu's arteritis (Tak)(3,4)), connective tissue diseases such as rheumatoid arthritis (RA) (5), systemic lupus erythematosus (SLE) (6), ankylosing spondylitis (7), and infections (especially syphilis (8) and tuberculosis (9)). In a significant fraction of cases, aortitis is diagnosed in patients with no history or clinical symptoms of a systemic disease (10–12). This type of aortitis is referred to as 'idiopathic aortitis' (IA). Isolated aortitis (IsA), a subtype of IA, is a single organ vasculitis diagnosed when detailed imaging of aortic branch vessels does not reveal abnormalities (11,13).

IA is presently a poorly defined entity with no specific pathological or clinical criteria for its classification or diagnosis. Furthermore, the term 'idiopathic aortitis' is used loosely for a variety of clinical settings, including cases that are classified as specific types of large vessel vasculitis (GCA or Tak) upon review of clinical history (12), and the terms 'isolated' and 'idiopathic aortitis' are often used interchangeably (10,11). All of the present knowledge about IA comes from retrospective series of cases with pathologically identified aortitis (10–12). The largest of these series come from the Mayo Clinic (an older series of 45 cases of aortitis, 21 of which are classified as idiopathic (10), and a more recent series of 64 patients with 52 cases of IA (11)) and Cleveland Clinic (an older series of 52 cases of aortitis, 36 of which were classified as idiopathic (12) and a recent yet unpublished report of 196 cases, with 129 cases of IA (14)). Since no guidelines exist to direct the initial workup, treatment, and subsequent monitoring of

1  
2  
3 these patients, great case-to-case variability is observed underlining the need for a more  
4  
5  
6 systematic approach to this emerging condition.  
7

8 This review was conducted to determine: 1) the frequency of idiopathic aortitis amongst  
9  
10 aortic specimens at The Ottawa Hospital over a 10 year period; 2) the clinical, biochemical, and  
11  
12 radiographic characteristics of idiopathic aortitis; 3) the approach to work-up, treatment and  
13  
14 follow-up taken by the treating physicians; and 4) long-term outcomes.  
15  
16  
17  
18  
19  
20

## 21 **Methods:**

22  
23 All cases of aortitis diagnosed on pathologic review of specimens of heart or aorta  
24  
25 between January 1, 2003 and July 31, 2013 at The Ottawa Hospital were identified by reviewing  
26  
27 the pathology database and searching the following terms: 'aorta', 'aortic', and 'aortitis'. Charts  
28  
29 of all identified cases were reviewed for demographics, clinical information, as well as available  
30  
31 laboratory investigations and imaging at baseline and follow-up.  
32  
33  
34  
35

36 Cases were classified as 1) infectious aortitis, 2) secondary aortitis (SA) associated with a  
37  
38 systemic vasculitis or another inflammatory condition, and 3) IA. Cases of IA where detailed  
39  
40 imaging of aortic branch vessels did not reveal abnormalities were further classified as IsA.  
41  
42  
43 Cases in group 3 (IA and IsA) constitute the focus of this study.  
44  
45

46 Descriptive statistics were used to summarize the outcomes using Microsoft Office Excel  
47  
48 2011. SPSS software (version 23) was used for logistic regression analyses.  
49  
50

51 This project was approved by the Ottawa Health Science Network Research Ethics Board  
52  
53 (OHSN-REB, protocol #: 20130549).  
54  
55  
56  
57  
58  
59  
60

## Results:

### Study group

Six hundred and eighty two aortic specimen were analyzed during the study period. Forty seven cases of aortitis were identified, giving the incidence of aortitis in aortic specimen of 6.9%. Seven cases (14% of aortitis) were infectious. Of the 40 cases of non-infectious aortitis, 32 (80% of non-infectious and 68% of all aortitis) were idiopathic (IA) and 8 (20% of non-infectious and 17% of all aortitis) were associated with a systemic condition (SA) (Figure 1). The systemic conditions associated with SA were isolated polymyalgia rheumatica (PMR), Takayasu's arteritis, and RA (n=1 for each), and 5 GCA (3 isolated, 1 in combination with PMR, and 1 with RA). In 3 cases classified as SA the associated systemic condition was diagnosed within 1 year following the diagnosis of aortitis. Out of the 32 cases of IA, 6 could be further classified as IsA. Incidence of non-infectious aortitis in our cohort is 5.9%, incidence of IA is 4.7% and incidence of IsA is 0.9%. Mean age of patients with IA was 63.8 years (range 17-83), and 18/32 (56.3%) were female (Table 1).

### Characteristics at the time of diagnosis of aortitis

Baseline characteristics of patients with idiopathic aortitis are presented in Table 1. The majority of patients with IA presented with either aneurysm-related symptoms such as chest pain and dyspnea (n=12, 38%) or incidentally discovered aneurysm on imaging or echocardiography (n=14, 44%). Other presentations included abdominal pain, weakness and lower extremity claudication. Presentation was unknown in 3 (9%) patients.

1  
2  
3 Out of 13 IA patients with at least one of ESR or CRP measured, 10 had significant  
4 elevation (>30) of ESR, CRP, or both (see Table 1 for further details).  
5  
6

### 7 8 *Imaging findings* 9

10 Computed tomography (CT) was the most common modality for preoperative imaging of  
11 IA, having been used in 25/32 (78%) of patients with IA. Of the remaining patients, 5 were  
12 assessed with echocardiography and imaging modality was not documented for 2.  
13  
14  
15  
16

17 Out of 23 IA-related aneurysms, all but one involved the ascending aorta: 6 were limited  
18 to ascending aorta and the rest had variable degree of proximal and distal extension (with 2  
19 spanning the whole length of aorta from ascending to abdominal); one aneurysm was limited to  
20 aortic arch. Nine IA patients did not have aneurysms but had their aortitis diagnosed on  
21 pathology of the specimen from aortic valve-related surgery or coronary artery bypass grafting.  
22  
23  
24  
25  
26  
27  
28  
29  
30

31 Twenty-one out of 32 patients (66%) with IA had complete imaging of aortic branch  
32 vessels. Branch vessel lesions were found in 15/21 (71%) of imaged patients, and additional  
33 aortic lesions were found in 3 (2 of whom also had branch vessel involvement) (see Table 2).  
34  
35  
36  
37  
38  
39  
40

### 41 Treatment of aortitis 42

43 Twelve out of 32 patients (38%) with non-infectious aortitis received treatment with  
44 glucocorticoids post-operatively, including 2/6 patients with IsA. Significant variability was  
45 observed both in the initial doses of prednisone (starting dose ranged between 20 and 100  
46 mg/day) and in the duration of treatment (ranging from 2.5 weeks to greater than 9 years, with  
47 definitive stop date only known for 3 patients).  
48  
49  
50  
51  
52  
53  
54  
55  
56  
57  
58  
59  
60

1  
2  
3 Three patients with IA received additional immunosuppressive agents between 5  
4  
5 months and 8 years after diagnosis of aortitis. One patient was diagnosed with RA at the time of  
6  
7 treatment with methotrexate, 8 years after diagnosis of IA, and in 2 patients the reason for use  
8  
9 of methotrexate is unknown.  
10  
11

12  
13 Logistic regression analysis was performed to identify predictors of treatment in patients  
14  
15 with IA. Out of age, sex, presence of cardiovascular risk factors, presence of additional  
16  
17 radiographic lesions on baseline imaging and having a significantly elevated inflammatory  
18  
19 marker (ESR and/or CRP >30), the latter was the only factor that significantly predicted  
20  
21 treatment status in both univariate and multivariate analyses. Having elevated inflammatory  
22  
23 markers increased the odds ratio for treatment with glucocorticoids by 7.9 and 21.4 in the 2  
24  
25 types of analyses, respectively (significance <0.05).  
26  
27  
28  
29  
30  
31  
32

### 33 Outcomes on follow-up

34  
35  
36 Mean follow-up duration was 47.5 months (range 1-123 months) in patients with IA.  
37

38  
39 CT and echocardiography were the most common modalities used for follow-up imaging  
40  
41 of IA, having been used in 23 and 10 patients respectively (some patients were studied with  
42  
43 more than one imaging modality). A minority of patients had further imaging with magnetic  
44  
45 resonance angiography (MRA), conventional aortography, and positron emission tomography  
46  
47 (PET).  
48  
49  
50

51  
52 Twelve out of 32 (38%) patients with IA had complete imaging of branch vessels at least  
53  
54 once during follow-up. Table 2 details the number and location of additional aortic and branch  
55  
56 lesions in IA patients. New lesions were found in 5/12 (42%) patients 3 months to 8 years  
57  
58  
59  
60

1  
2  
3 following surgery, and none of the patients with new lesions at follow-up were initially classified  
4  
5 as IsA.  
6  
7

8 Development of additional radiographic lesions at follow-up in patients with IA did not  
9  
10 differ significantly by treatment status. Out of the 12 patients who had complete follow-up  
11  
12 imaging, half received post-operative glucocorticoids; 3 of the treated and 2 of the untreated  
13  
14 patients developed delayed lesions. Notably, 10/12 imaged patients with IA, and all 5 patients  
15  
16 with new lesions, had additional branch lesions at the time of diagnosis of IA.  
17  
18  
19

20  
21 Logistic regression analyses did not identify significant predictors for development of  
22  
23 delayed radiographic lesions. Presence of additional radiographic abnormalities at the time of  
24  
25 diagnosis of aortitis was identified as a strong (and the only) predictor of having complete  
26  
27 follow-up imaging; having additional radiographic abnormalities at baseline increased the odds  
28  
29 ratio of having complete follow-up imaging by a factor of 9.3 (univariate logistic regression  
30  
31 model).  
32  
33  
34  
35

36 Three patients with IA had additional surgeries during the follow-up period: 2 patients  
37  
38 required endovascular stenting of the thoracic aorta at the site of initial surgery 2 and 4 months  
39  
40 after their original aortic surgeries, and the patient with IsA who had 2 distinct aortic lesions  
41  
42 underwent open thoracoabdominal aneurysm repair 31 months after the original aortic  
43  
44 surgery.  
45  
46  
47

48 Three patients were diagnosed with a systemic condition within one year of diagnosis of  
49  
50 aortitis (2 GCA and 1 Takayasu's), and these were classified as cases of SA. Two patients were  
51  
52 diagnosed with a new systemic condition during follow-up – 1 with cutaneous lupus  
53  
54 erythematosus 6.2 years following surgery and 1 with RA 8 years following surgery. Given the  
55  
56  
57  
58  
59  
60



1  
2  
3 length of time between diagnoses of aortitis and new systemic conditions, these patients were  
4  
5 analyzed as cases of IA. Neither of these patients had IsA as their initial diagnosis. One patient  
6  
7 with IA (later diagnosed with cutaneous lupus erythematosus) was reported deceased from a  
8  
9 high-grade myelodysplastic syndrome.  
10  
11  
12  
13  
14  
15

### 16 **Discussion:**

17  
18 We identified 32 cases of IA, 6 of which were further classified as IsA. Additional aortic or  
19  
20 branch vessel lesions were found in 16/21 (76%) imaged patients with IA at baseline, and 12/32  
21  
22 patients (38%) with IA received perioperative treatment with glucocorticoids. During the mean  
23  
24 follow-up duration of 47.5 months, 5 out of 12 imaged patients (42%) developed new  
25  
26 radiographic lesions, 3 required additional vascular surgery, and 2 received diagnosis of a  
27  
28 systemic condition.  
29  
30  
31  
32

33 The incidence of aortitis amongst aortic specimens in our cohort is 6.9% and the  
34  
35 incidence of IA is 4.7%, comparable to incidences of 2-9% described in published retrospective  
36  
37 series (10–12,15,16). The majority of cases of aortitis in our cohort were idiopathic, consistent  
38  
39 with the existing literature (3,11,12). Median age of our IA cohort was 64 years, also within the  
40  
41 reported range of 63-71 years in studies from 2000-2014 (10–12,14). We observed roughly  
42  
43 equal gender distribution (56% female), similar to findings by Liang et al (50%) (11); in contrast,  
44  
45 a number of previous reports highlight female predominance in cases of IA (12,14), which is the  
46  
47 opposite of the male predominance typically observed in cases of idiopathic non-inflammatory  
48  
49 abdominal aortic aneurysms. Aortic aneurysms associated with IA were limited to the thoracic  
50  
51 aorta in 91% of cases in our study, comparable to those seen by Rojo-Leva (12) and Miller (10)  
52  
53  
54  
55  
56  
57  
58  
59  
60

1  
2  
3 (96% in each) and those reported for aortitis associated with systemic conditions including GCA  
4  
5  
6 (1,17,19), RA (10,18), and SLE (6).  
7

8  
9  
10  
11  
12  
13  
14  
15  
16  
17  
18  
19  
20  
21  
22  
23  
24  
25  
26  
27  
28  
29  
30  
31  
32  
33  
34  
35  
36  
37  
38  
39  
40  
41  
42  
43  
44  
45  
46  
47  
48  
49  
50  
51  
52  
53  
54  
55  
56  
57  
58  
59  
60

Thirty eight percent of our patients with IA were treated with glucocorticoids, which is slightly higher than the range of 9-34% reported in previous studies (10–12,14). This may be the result of increase in treatment with increased recognition of IA over time. Studies with lower rates of treatment, including those by Rojo et al (21%) (12) and Miller et al (9%) (10) reviewed cases of IA dating back to 1977 and 1985, respectively, whereas the oldest cases included in our cohort were from 2003.

Sixty six percent of our IA patients had complete imaging of aortic branch vessels, with additional lesions found at baseline in 76% of imaged patients. Liang et al reported a similar rate of baseline radiographic lesions of 72% in their cohort of non-infectious aortitis with imaging rate of 89% (11). In our study only 12/32 (38%) patients with IA had complete follow-up imaging, and 5/12 (42%) were found to have developed new aortic or branch lesions. This incidence of delayed radiographic lesions is similar to 44.6% reported in the study by Clifford (14), where routine follow-up imaging was performed on all patients. Notably, we found presence of additional radiographic lesions at the time of diagnosis of aortitis to be strongly predictive of having complete follow-up imaging. While tendency to follow-up patients with existing radiographic abnormalities seems to be intuitive, evidence and guidelines regarding appropriate follow-up of patients with IA are lacking resulting in great variability.

Interestingly, the only variable that predicted treatment with glucocorticoids in this study was having a significantly elevated ESR or CRP (>30 for either) at the time of diagnosis of aortitis. Notably, only 3 of 13 tested patients in our study had normal inflammatory markers,

1  
2  
3 while many previous studies report relatively normal inflammatory markers in most patients  
4  
5 with IA (11,20). This suggests the possibility of confounding by indication, with inflammatory  
6  
7 markers being tested preferentially in patients suspected to have systemic inflammation and  
8  
9 considered for treatment. In view of current lack of guidelines regarding which patients need to  
10  
11 be treated, or evidence that treatment changes outcomes altogether (21), the approach of  
12  
13 treating patients with evidence of systemic inflammation seems reasonable.  
14  
15  
16  
17

18 Our study is primarily limited by its retrospective design and the relatively small size of  
19  
20 the cohort. In view of the relatively recent recognition of IA as an entity and its rarity, all  
21  
22 currently available literature on this condition is retrospective. This paper describes the first  
23  
24 Canadian cohort with IA reported to date. We present detailed descriptions of clinical,  
25  
26 laboratory, and radiographic findings both at baseline and at follow-up, and additionally review  
27  
28 corticosteroid and immunosuppressive therapies used to treat patients with IA.  
29  
30  
31  
32

33 No consensus exists regarding the appropriate way to work-up, treat, and follow patients  
34  
35 with IA, resulting in great variability of approaches both between and within reported studies.  
36  
37 Studying such heterogeneous populations in turn makes it difficult to draw conclusions with  
38  
39 regard to the optimal strategy for managing this rare condition. Larger, prospective and  
40  
41 systematic studies are required to address unanswered clinical questions regarding idiopathic  
42  
43 and isolated aortitis.  
44  
45  
46  
47  
48  
49  
50  
51  
52  
53  
54  
55  
56  
57  
58  
59  
60

**References:**

1. Gornik HL, Creager MA. Aortitis. *Circulation* 2008;117:3039-51.
2. Lie JT. Aortic and extracranial large vessel giant cell arteritis: A review of 72 cases with histopathologic documentation. *Semin Arthritis Rheum* 1995;24:422-31.
3. Svensson LG, Arafat A, Roselli EE, Idrees J, Clifford A, Tan C, et al. Inflammatory disease of the aorta: Patterns and classification of giant cell aortitis, Takayasu arteritis, and nonsyndromic aortitis. *J Thorac Cardiovasc Surg* 2014;1-6.
4. Sato E, Lima DN, Espirito Santo B, Hata F. Takayasu arteritis. *Int J Cardiol* 2000;75:S163-66.
5. Slobodin G, Naschitz JE, Zuckerman E, Zisman D, Rozenbaum M, Boulman, N, et al. Aortic involvement in rheumatic diseases. *Clin Exp Rheumatol* 2006;24:S41-47.
6. Guard RW, Gotis-Graham I, Edmonds JP, Thomas AC. Aortitis with dissection complicating systemic lupus erythematosus. *Pathology* 1995;27:224-28.
7. Tucker CR, Fowles RE, Calin A, Popp RL. Aortitis in ankylosing spondylitis: early detection of aortic root abnormalities with two dimensional echocardiography. *Am J Cardiol* 1982;49:680-86.
8. Jackman JD, Radolf JD. Cardiovascular syphilis. *Am J Med* 1989;87:425-33.
9. Cargile JS, Fisher DF, Burns DK, Fry WJ. Tuberculous aortitis with associated necrosis and perforation: treatment and options. *J Vasc Surg Off Publ Soc Vasc Surg [and] Int Soc Cardiovasc Surgery, North Am Chapter* 1986;4:612-15.

- 1  
2  
3 10. Miller DV, Isotalo PA, Weyand CM, Edwards WD, Aubry M-C, Tazelaar HD. Surgical  
4  
5  
6 pathology of noninfectious ascending aortitis: a study of 45 cases with emphasis on an  
7  
8  
9 isolated variant. *Am J Surg Pathol* 2006;30:1150-58.
- 10  
11 11. Liang KP, Chowdhary VR, Michet CJ, Miller DV, Sundt TM, Connolly HM, et al.  
12  
13  
14 Noninfectious ascending aortitis: A case series of 64 patients. *J Rheumatol* 2009;36:2290-  
15  
16  
17 97.
- 18  
19 12. Rojo-Leyva F, Ratliff NB, Cosgrove DM, Hoffman GS. Study of 52 patients with idiopathic  
20  
21  
22 aortitis from a cohort of 1,204 surgical cases. *Arthritis Rheum* 2000;43:901-07.
- 23  
24 13. Jennette JC, Falk RJ, Bacon PA, Basu N, Cid MC, Ferrario F, et al. 2012 Revised  
25  
26  
27 International Chapel Hill Consensus Conference Nomenclature of Vasculitides. *Revmatol*  
28  
29  
30 2012;20:5-15.
- 31  
32 14. Clifford A, Arafat A, Idrees J, Roselli EE, Tan C, Rodriguez ER, et al. Aortitis: Outcomes  
33  
34  
35 from a cohort of 196 patients [abstract]. *American College of Rheumatology Annual*  
36  
37  
38 Meeting. Boston, USA: *Arthritis and Rheumatology*; 2014.
- 39  
40 15. Kerr LD, Chang YJ, Spiera H, Fallon JT. Occult active giant cell aortitis necessitating surgical  
41  
42  
43 repair. *J Thorac Cardiovasc Surg* 2000;120:813-15.
- 44  
45 16. Pacini D, Leone O, Turci S, Camurri N, Giunchi F, Martinelli GN, et al. Incidence, etiology,  
46  
47  
48 histologic findings, and course of thoracic inflammatory aortopathies. *Ann Thorac Surg*  
49  
50  
51 2008;86:1518-23.
- 52  
53  
54 17. Nuenninghoff DM, Hunder GG, Christianson TJH, McClelland RL, Matteson EL. Incidence  
55  
56  
57  
58  
59  
60

1  
2  
3 and predictors of large-artery complication (aortic aneurysm, aortic dissection, and/or  
4  
5 large-artery stenosis) in patients with giant cell arteritis: A population-based study over  
6  
7  
8 50 years. *Arthritis Rheum* 2003;48:3522-31.  
9

- 10  
11 18. Gravallesse EM, Corson JM, Coblyn JS, Pinkus GS, Weinblatt ME. Rheumatoid aortitis: a  
12  
13 rarely recognized but clinically significant entity. *Med* 1989;68:95-106.  
14  
15  
16  
17 19. Loricera J, Blanco R, Hernandez JL, Carril JM, Martinez-Rodriguez I, Canga A, et al. Non-  
18  
19 infectious aortitis: a report of 32 cases from a single tertiary centre in a 4-year period and  
20  
21 literature review. *Clin Exp Rheumatol* 2015;33(Suppl.89):S19-S31.  
22  
23  
24  
25 20. Wang H, Li L, Wang L, Chang Q, Pu J. Comparison of clinical and pathological  
26  
27 characteristics of isolated aortitis and Takayasu arteritis with ascending aorta  
28  
29 involvement. *J Clin Pathol* 2012:362-67.  
30  
31  
32  
33 21. Merkel PA. Noninfectious ascending aortitis : Staying ahead of the curve [editorial]. *J*  
34  
35  
36  
37  
38  
39  
40  
41  
42  
43  
44  
45  
46  
47  
48  
49  
50  
51  
52  
53  
54  
55  
56  
57  
58  
59  
60

**Tables:**

Table 1. Baseline characteristics of patients with idiopathic aortitis

| <b>Clinical features</b>                                                        | <b>Number (%)<br/>(out of 32)</b> |
|---------------------------------------------------------------------------------|-----------------------------------|
| Age, mean in years (range)                                                      | 63.8 (17-83)                      |
| Sex, female                                                                     | 18 (56%)                          |
| Smoking status                                                                  |                                   |
| At/prior to diagnosis                                                           | 22 (69%)                          |
| Never                                                                           | 4 (13%)                           |
| Unknown                                                                         | 6 (19%)                           |
| Comorbidities at diagnosis                                                      |                                   |
| Hypertension                                                                    | 20 (63%)                          |
| Dyslipidemia                                                                    | 14 (44%)                          |
| CAD                                                                             | 14 (44%)                          |
| CVA/TIA                                                                         | 5 (16%)                           |
| Diabetes mellitus                                                               | 4 (13%)                           |
| Chronic renal failure                                                           | 2 (6%)                            |
| Medications at diagnosis                                                        |                                   |
| ASA                                                                             | 31 (97%)                          |
| Other antiplatelet                                                              | 3 (9%)                            |
| ACE inhibitor/ARB                                                               | 18 (56%)                          |
| Beta-blocker                                                                    | 27 (84%)                          |
| Statin                                                                          | 12 (38%)                          |
| ≥1 antihypertensive                                                             | 30 (94%)                          |
| Inflammatory markers                                                            |                                   |
| Number with measured ESR/CRP                                                    | 12/9                              |
| ESR (mm/hr), mean (range)                                                       | 41.0 (5-75)                       |
| CRP (mg/L) , mean (range)                                                       | 82.8 (6.6-179)                    |
| Presence of additional radiographic lesions,<br>out of 21 fully imaged patients | 16/21 (76%)                       |
| Additional aortic lesions                                                       | 3/21 (14%)                        |
| Additional branch lesions                                                       | 15/21 (71%)                       |

CAD, coronary artery disease; CVA, cerebrovascular accident; TIA, transient ischemic attack; ASA, acetylsalicylic acid; ACE, angiotensin-converting enzyme; ARB, angiotensin II receptor blocker.

Table 2. Additional aortic or aortic branch lesions in patients with idiopathic aortitis (total 32 patients)

| Location                  | Before or at diagnosis of aortitis                                                                                                                                                                                                                                                                                                         | Delayed (3 months-8 years post-op)                                                                                                                                                                   |
|---------------------------|--------------------------------------------------------------------------------------------------------------------------------------------------------------------------------------------------------------------------------------------------------------------------------------------------------------------------------------------|------------------------------------------------------------------------------------------------------------------------------------------------------------------------------------------------------|
| Aorta or branches (total) | 16 patients with additional lesions at diagnosis                                                                                                                                                                                                                                                                                           | 5 patients with additional lesions at follow-up                                                                                                                                                      |
| Additional aortic lesions | 3 patients (1 isolated and 2 with additional branch lesions)<br>1 AAA<br>1 residual Type B dissection<br>1 distal abdominal aortic stenosis                                                                                                                                                                                                | 3 patients (all with additional branch lesions)<br>2 AAA<br>1 increased aortic wall thickness                                                                                                        |
| Additional branch lesions | 15 out of 21 imaged patients<br>5 carotid stenosis < 50%<br>11 arch branch dilatations in 7 pts<br>5 right innominate<br>2 carotid<br>3 subclavian<br>1 all vessels; spont. resolution<br>1 arch branch thickening<br>1 left internal carotid artery occlusion<br>2 iliac stenoses<br>2 dissections<br>1 common iliac<br>1 left subclavian | 5 out of 12 imaged patients<br>3 arch branch dilatations in 3 pts<br>1 right innominate<br>1 carotid<br>1 subclavian<br>1 left common iliac artery dissection<br>1 left common iliac artery aneurysm |

AAA, abdominal aortic aneurysm



1  
2  
3  
4  
5  
6  
7  
8  
9  
10  
11  
12  
13  
14  
15  
16  
17  
18  
19  
20  
21  
22  
23  
24  
25  
26  
27  
28  
29  
30  
31  
32  
33  
34  
35  
36  
37  
38  
39  
40  
41  
42  
43  
44  
45  
46  
47  
48  
49  
50  
51  
52  
53  
54  
55  
56  
57  
58  
59  
60

**Figure legends:**

Figure 1. All cases of aortitis identified on pathologic review of surgical specimen

Confidential

1  
2  
3  
4  
5  
6  
7  
8  
9  
10  
11  
12  
13  
14  
15  
16  
17  
18  
19  
20  
21  
22  
23  
24  
25  
26  
27  
28  
29  
30  
31  
32  
33  
34  
35  
36  
37  
38  
39  
40  
41  
42  
43  
44  
45  
46  
47  
48  
49  
50  
51  
52  
53  
54  
55  
56  
57  
58  
59  
60

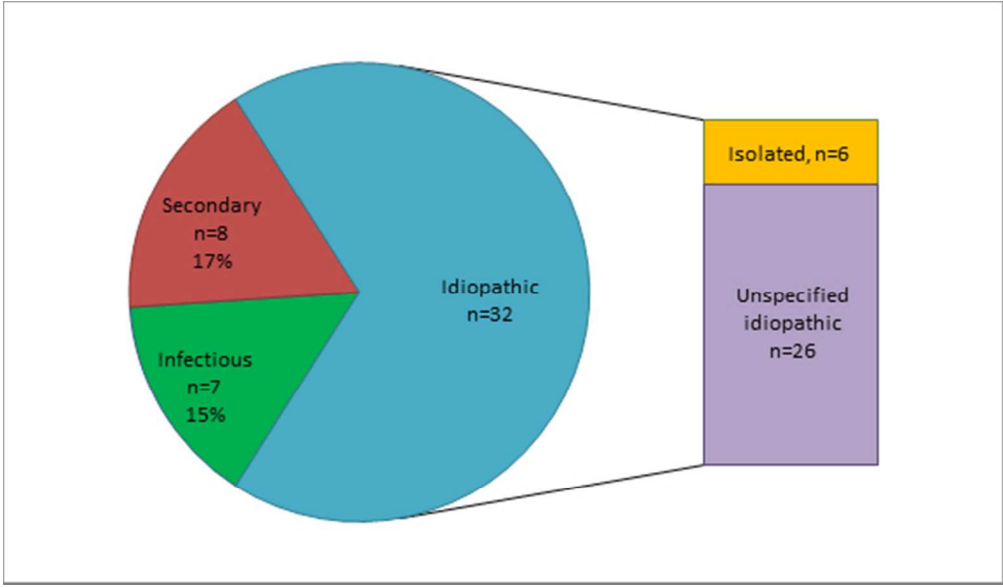

Figure 1. All cases of aortitis identified on pathologic review of surgical specimen

Confidential
